# Supplementary material for: Abiotic Stress in Crop Production
Source: MDPI journal article supplement (doi:10.3390/ijms24076603), 2023-04-01
Supplement: s1 [file s1]

## Supplementary material S1

Methodology for finding publications focused on abiotic stress

Data included in Panel 1B were derived from Clarivate Web of Science ([www.webofscience.com](http://www.webofscience.com)). Data were selected by following criteria:

Topic 1: wheat / sugar beet / maize / potato / barley / sunflower / grapes / rapeseed / tomato / apple

Topic 2: drought / salt / cold / heat

Document type: Article

Categories: Plant Sciences, Agronomy, Environmental Sciences, Agriculture Multidisciplinary, Biochemistry Molecular Biology, Soil Science, Horticulture, Water resources, Genetics Heredity, Biology, Forestry, Cell Biology, Physiology
