# Supplementary material for: Abiotic Stress in Crop Production
Source: Int J Mol Sci. 2023 Apr 1;24(7):6603. doi: 10.3390/ijms24076603 (PMC10095105; doi:10.3390/ijms24076603)
Supplement: Supplementary file 1 [file ijms-24-06603-s001.zip › Supplementary_Table S1.xlsx]

## Sheet: common for 3 stresses
Supplementary Table S1. Functional group of genes with similar stress regulation in three abiotic stresses
UP-regulated	DOWN-regulated
AT3G01820	AT1G24100
AT5G09590	AT1G80850
AT2G47180	AT3G22235
AT2G25620	AT5G13090
AT3G03640	AT1G16370
AT4G03960	AT2G28470
AT1G78780	AT5G06790
AT3G61630	AT1G43800
AT3G02990	AT1G68560
AT3G14230	AT5G05730
AT4G01120	AT3G05910
AT1G68550	AT5G25460
AT3G01600	AT4G39940
AT5G43150	AT5G50335
AT3G47420	AT1G78830
AT2G23340	AT1G48330
AT5G61510	AT2G41540
AT1G56170	AT1G69530
AT3G28210	AT5G50740
AT1G32950	AT1G09390
AT3G49780	AT5G04150
AT1G06570	AT3G63110
AT3G15210	AT4G38850
AT2G19450	AT5G05890
AT5G51440	AT1G32540
AT5G15870	AT3G56980
AT5G27760	AT3G18080
AT5G63130	AT1G66820
AT2G21640	AT4G27440
AT5G16200	AT3G01550
AT2G41730	AT2G20750
AT4G27657	AT5G44020
AT3G22370	AT1G29440
AT5G17850	AT5G01015
AT5G53970	AT5G65730
AT2G24100	AT5G63780
AT5G59820	AT5G57780
AT5G15450	AT1G75960
AT3G02140	AT5G42650
AT3G16860	AT3G02170
AT5G04250	AT5G40450
AT5G01600	AT4G37610
AT3G09350	AT5G16030
AT1G32870	AT1G29510
AT2G41010	AT2G40610
AT2G22470	AT4G14540
AT1G07500	AT2G21650
AT5G62040	AT5G65010
AT3G57540	AT1G23480
AT1G02220	AT4G14130
AT2G38530	AT1G25230
AT2G37760	AT3G19850
AT5G59720	AT3G16370
AT5G66460	AT1G78970
AT5G10300	AT5G15310
AT1G70300	AT5G61440
AT5G45630	AT1G67910
AT1G62290	AT5G44260
AT4G33550	AT1G29460
AT2G38340	AT5G59130
AT3G48520	AT4G01390
AT1G64660	AT5G02760
AT3G05690	AT1G70290
AT1G24600	AT1G66100
AT4G34230	AT2G25900
AT4G18280	AT3G46490
AT3G55890	AT5G11070
AT3G08590	AT2G40490
AT1G05100	AT5G45820
AT1G69790	AT2G36050
AT4G26080	AT1G68590
AT1G77000	AT5G52120
AT3G29575	AT3G06080
AT1G01720	AT3G15450
AT1G60470	AT4G11290
AT5G63970	AT4G24350
AT5G59845	AT1G22330
AT3G57380	AT3G03840
AT3G46230	AT3G62950
AT5G38530	AT5G57030
AT5G14800	AT3G48360
AT3G03310	AT1G73830
AT4G30490	AT1G29500
AT1G43160	AT1G68190
AT5G53120	AT1G49975
AT1G73040	AT4G35770
AT5G39050	AT1G06080
AT3G23920	AT3G25190
AT4G26270	AT5G14120
AT1G02390	AT2G18300
AT1G80110	AT1G23080
AT5G51890	AT5G16590
AT4G21440	AT1G75460
AT3G18280	AT3G01480
AT4G21580	AT1G09750
AT5G03190	AT5G66590
AT1G64950	AT1G31920
AT2G33590	AT5G19120
AT2G23110	AT3G13750
AT3G05030	AT5G44680
AT3G16360	AT2G37640
AT3G02875	AT2G34490
AT2G46270	AT1G23390
AT5G05110	AT2G33180
AT1G54160	AT1G73600
AT1G05340	AT3G57040
AT5G12030	AT4G01460
AT1G53540	AT4G36540
AT4G10250	AT2G20670
AT1G02850	AT5G52780
AT1G19180	AT4G12730
AT3G20300	AT3G04210
AT5G13330	AT2G44740
AT4G25000	AT3G07010
AT4G27830	AT1G54820
AT5G50800	AT4G19530
AT5G50720	AT3G22210
AT5G66760	AT3G27690
AT4G19810	AT2G30600
AT2G30770	AT2G32100
AT4G05020	AT2G06850
AT2G43580	AT3G58120
AT5G23220	AT5G54380
AT3G23250	AT3G06070
AT5G53870	AT5G39860
AT1G16510	AT5G18060
AT2G43570	AT3G06750
AT5G49480	AT2G17880
AT3G04240	AT5G22920
AT2G16990	AT1G79790
AT5G09530	AT2G26710
AT2G04050	AT5G49450
AT1G70810	AT5G58310
AT3G24170	AT1G80440
AT5G26340	AT3G21950
AT5G13750	AT5G64410
AT4G34590	AT1G03870
AT5G25110	AT4G17490
AT5G57050	AT4G24780
AT1G32900	AT3G10080
AT1G30700	AT5G59090
AT1G20450	AT2G39870
AT4G25480	AT2G23770
AT5G47060	AT1G49780
AT2G21590	AT5G48900
AT1G05680	AT2G40150
AT1G75170	AT5G16250
AT4G39210	AT1G04680
AT4G39730	AT5G10390
AT1G32350	AT5G59870
AT4G13180	AT1G56430
AT2G38250	AT1G59590
AT5G47880	AT5G61600
AT3G25870	AT2G37950
AT1G17180	AT5G59680
AT1G61800	AT5G35740
AT1G02310	AT4G12030
AT2G38465	AT5G22880
AT1G01250	AT4G28250
AT4G19230	AT1G78170
AT1G77380	AT1G72920
AT4G09020	AT3G49940
AT2G04350	AT1G04040
AT1G01470	AT4G38950
AT4G17550	AT3G20570
AT4G23600	AT4G31840
AT1G68570	AT1G65860
AT1G72680	AT1G09200
AT2G30140	AT4G13840
AT5G57530	AT2G37030
AT5G20830	AT3G12610
AT3G50930	AT2G37130
AT2G46680	AT3G54260
AT2G25625	AT2G46710
AT5G13200	AT5G07460
AT5G16980	AT4G39770
AT4G25790	AT1G62800
AT3G15352	AT3G46780
AT4G12480	AT3G56160
AT4G37990	AT3G28080
AT3G55940	AT1G14700
AT1G80130	AT1G01080
AT5G08380	AT1G70890
AT2G29460	AT1G13650
	AT4G32570
	AT2G15050

## Sheet: common for 4 stresses
Supplementary Table 1. Functional group of genes with similar stress regulation in all four abiotic stresses
UP-regulated	DOWN-regulated
AT1G79270	AT5G60890
AT1G77450	AT5G24420
AT1G76590	AT1G01390
AT3G48510	AT4G29740
AT5G05410	AT1G21100
AT1G62570	AT3G03190
AT4G34710	AT2G14750
AT1G77120	AT1G65870
AT1G73010	AT4G17245
AT3G17790	AT2G43550
AT1G64970	AT2G26530
AT2G37770
AT2G36750
AT3G14440
AT5G11110
AT3G13784
AT1G60190
AT1G07430
AT1G61340
AT4G39670
AT2G37970
AT3G51860
AT3G53230
AT3G59820
AT4G21680
AT1G69480
AT4G03320
AT1G67360
AT5G03210
AT2G32190
AT4G15910
AT3G22840
AT1G78070
AT5G61820
AT4G36010
AT1G67920
AT5G15190
AT5G19875
